# Supplementary material for: Edematous severe acute malnutrition is characterized by hypomethylation of DNA
Source: PubMed Central journal article supplement (PMC6923441; doi:10.1038/s41467-019-13433-6), 2019-12-19
Supplement: 41467_2019_13433_MOESM3_ESM.pdf [file 41467_2019_13433_MOESM3_ESM.pdf]

## Description of Additional Supplementary Files

File Name: Supplementary Data 1

Description: Single CpG associations.

File Name: Supplementary Data 2

Description: Significant differentially methylated loci, ordered by increasing P-value.

File Name: Supplementary Data 3

Description: Methylation-Gene Expression correlations.

File Name: Supplementary Data 4

Description: Kwashiorkor associated human phenotype ontologies.

File Name: Supplementary Data 5

Description: Study Gene Ontologies.

File Name: Supplementary Data 6

Description: MeQTL regions with significant slope interactions.

File Name: Supplementary Data 7

Description: Putative nutrition-sensitive meQTL SNPs that strongly alter likelihood of transcription factor binding.

File Name: Supplementary Data 8

Description: Non-nutrition-sensitive meQTL SNPs that strongly alter likelihood of transcription factor binding.

File Name: Supplementary Data 9

Description: Correlation between buccal and blood at differentially methylated loci.
